# Supplementary material for: Three Heat Shock Protein Genes and Antioxidant Enzymes Protect Pardosa pseudoannulata (Araneae: Lycosidae) from High Temperature Stress
Source: MDPI journal article supplement (doi:10.3390/ijms232112821), 2022-10-24
Supplement: s1 [file s1]

```

1      CATATTTCAATTTCAATTTCAACCCGGTTCCAGAAGCGTCTCTGGCGTCTGTTTCAAATCCTTTGGTTTATTCTCTCTCTGAATTC
91     AACATCTAAAAACAGCCATGCTCTTTTCGAGCGCCGCTTCCCTCTTGAGGAGTGACTTCAGCGTGATTGACCGGAGTTCA
1      M S F E R R L P L L R S D F S V I D R E F S S I
181    CGCGAAAAGTTTGACGAGGAGATGCGTCTGATGGAGGAGGAGATGAACCGCTTCAGGCTCAACTGTTGGACCGTGAGGTG
25     R E K F D Q E M R L M E E E M N R F R S Q L L D R E V P R I
271    CAGAGCCACAGCACAGCCACCGGACCGACGACAGACACACAGGTCGAGGTGAGGACGTGGCTCGACGGACTCAGCTG
55     Q S H S T A T G T D G Q T T H R S E V R T W L D G L S S P L
361    ATACAGGACTCGGACGACGAAAAGAAGCTCAGGCTCAGGTTGATGTCAGCCAATATCAGCCTGAGGAGATCGTCGTC
85     I Q D S D D G K K L R L R F D V S Q Y Q P E E I V V K T V D
451    AACAACTACAGGTTCAAGCCAAACACGAAGAAAAATCTGACACTAAGTCTGTGTACCGGAGTACAACAGAGAATTCTCCTT
115    N K L Q V Q A K H E E K S D T K S V Y R E Y N R E F L L P K
541    GGAACAAATCCTGAAATGATCAAATCCTCTCTGTCAACAGATGGCGTCTCACAGTCGAAGCTCCTTACCACCAGCTTTA
145    G T N P E M I K S S L S T D G V L T V E A P L P P A L E A G
631    GTTCATATGATACCCATCGAAAACAAATAACTTTTTAAAAATCCATTTTATATCGTTTACAGAACTACAAGTTGCTAA
175    V H M I P I E N K *
721    AGTTGTACTGGAACACATAGTATTTCTTGTAGTTTTATATAAAAAATAAAAAATATTGATGTATTTATCATGGATG
811    CATGGATATTTACGGTATTGGTTCTCTGTAACCGCTTCTGAAATTTTTTTTATTACAAGTCACCTAATGTCATTAATTC
901    TTTCTGTGCGGTAAATTTCTTGTGATGATGTTAAATTAATGCAGTTCGGCAATAAAATTACATTCTGAAAAA
991    AAAAAA

```

**Figure S1.** Nucleotide and deduced AA sequences of *PpHSP27* from *P. pseudoannulata*s. A putative polyadenylation signal is marked in blue. Characteristic sequences of the small heat shock proteins (sHSP) family are marked in yellow. Promoters and terminators are marked in green.

```

1      GTTACAATTTTCGGCTCCTGAGCCGCACATGCTTTTGTATAATTTACTATAGGGGCTCTCTGCTTCAGTATTGACACTTCTTACTCCTTT
91     TGTAAATTTGAGTCTAATTTATTTTCTCGCTTATATTACTTCTATAGGTATAGTTTTAAAGTCATCATGTACAGATTACACCATTTAA
1      M Y R L H H L
181    CCCGACCTCTCTCTCGACAAATATCATGGAGTATTAGAAGAAATTATGCTAAAGATGTCAAATTTGGCCAGATGTTAGAGCAGCTATGC
8      T R P L S R Q I S W S I R R N Y A K D V K F G P D V R A A M
271    TACAAGGTGTAGATGTCTTGGCTGATGCAGTTGCTGTAACAATGGGACCAAGGGTAGAAATGTCATTATTGAACAGTCTGGGGCTCTC
38     L Q G V D V L A D A V A V T M G P K G R N V I I E Q S W G S
361    CCAAAATTACAAAAGATGGTGTACTGTTGCAAAAGCTATTGAACTTAAGGATAAGTTCCAAAATATTGGAGCTAAACTTGTTCAGATG
68     P K I T K D G V T V A K A I E L K D K F Q N I G A K L V Q D
451    TTGCAAATAATACTAATGAAGAAGCAGGAGATGGTACAACAACAGCTACAGTATTAGCAAGAGCAATTGCTAAAGAAGGATTGAAAAAA
98     V A N N T N E E A G D G T T T A T V L A R A I A K E G F E K
541    TTAGCAAAGGAGCTAACCAATTGAATTTAGGAAAGGTGTCATGCTAGCTGTTGAAAGAGTTGTTGAAGAATTAAGAAAAAATTCAAAC
128    I S K G A N P I E F R K G V M L A V E R V V E E L R K N S K
631    CTGTTACAACCTCCAGAAGAAATAGCCAGGTTGCTACAATTTCTGCAAAATGGAGATAAAACAATAGGTGATCTTATATCTAGTGCTATGA
158    P V T T P E E I A Q V A T I S A N G D K T I G D L I S S A M
721    AAAAAAGTTGAAAAGATGGTGTAAATTACTGTCAAAGATGGAAGACATTGAGTGACGAATTAGAAGTTATTGAAGGCATGAAATTTGATA
188    K K V G K D G V I T V K D G K T L S D E L E V I E G M K F D
811    GGGGTTATATATCACCTATTTTCATCAATACAGCTAAAGGTGCCAAAGTTGAATATCAAGATGCTCTAGTTTTGTTAGTGAAGAAAAA
218    R G Y I S P Y F I N T A K G A K V E Y Q D A L V L F S E K K
901    TATCTAGTGACAGTCAATTATACCTGCACTTGAATTAGCTAACTCAAAGCGAAAGCCTCTTATAATTGTTGCTGAAGATGTAGATGGTG
248    I S S V Q S I I P A L E L A N S K R K P L I I V A E D V D G
991    AAGCTTTAAGTACTATGGTTCTGAACAGGTTAAGTTGTTGCAAGTAGCTGCAGTCAAAGCTCCTGTTTGGAGATAACAGAAAAA
278    E A L S T M V L N R L K V G L Q V A A V K A P G F G D N R K
1081   GTACTCTTCATGATATGCCATTGCTACAGGTGGTATTGTTTTTGGTGATGATGCTGATCTCGTTAAACTAGAGGATGTTACGCCAACAG
308    S T L H D M A I A T G G I V F G D D A D L V K L E D V Q P T
1171   ATCTCGGAGAGGTTTCTGAAGTTGTTATTACCAAAGATGATACTCTATTGCTTAAGGGAAAGGGCAACAAGCAAGACATTGATAGAAGAA
348    D L G E V S E V V I T K D D T L L L K G K G N K Q D I D R R
1261   TTGCTCAAATCAAAGATGAGATTGAACAAACAACGTCCAGTATGAGAAAGAAAACTTCAAGAAAGACTTGAAGGCTATCTAATTGGTG
1378   I A Q I K D E I E Q T T S Q Y E K E K L Q E R L A R L S N G
1351   TTGCACTTCTCAAGGTTGGAGGCTCTAGTGAAGTAGAAGTAAATGAGAAAAAGGACAGAGTGACTGATGCAATTGAATGCAACCCGTGCTG
408    V A L L K V G G S S E V E V N E K K D R V T D A L N A T R A
1441   CGGTTGAAGAAGGAATTGTTGCTGGTGGAGGAACAGCCCTTTTAAAGATGCTTACCAGCTCTTGATGAAATTTCTTATGAAAAATGAAGACC
438    A V E E G I V A G G G T A L L R C L P A L D E I S Y E N E D
1531   AGAAAATTGGTGTGACATAGTCAGGCGATCTCTGAAGATGCCATGCACACAAATTGCAATGAATGCTGGTGTGATGCTGCTGTAGTCA
468    Q K I G V D I V R R S L K M P C T Q I A M N A G V D A A V V
1621   CTCAAAAAGTTCTGGACAACAAAGGTGAATTTGTTATGATGCATTGCGGGGAGAATATGTAAACATGATTGAAGCTGGAATAATTGATC
498    T Q K V L D N K G E F G Y D A L R G E Y V N M I E A G I I D
1711   CTACAAAAGTGGTAAGGACAGCTTAAATGGATGCTGCTGGTGTGTCATCTTCTTACTACTGCTGAATCTGTTATTGTTGAAATCCCCA
528    P T K V V R T A L M D A A G V A S L L T T A E S V I V E I P
1801   AAGAAGAGAAACCTCCAATGGGTGGTGGCATGGGAGGTATGGGCGGTATGGGTGACTATGGAATGTAACAACCTAATCAAATTAGATAGT
558    K E E K P P M G G G M G G M G G M G D Y G M *
1891   TTTGTGCTGAACTTTAAAAATATCAGGAACACTGCAGGACATTACAGTGGCAACATTATGCATTTGAACTCATGCCATTCCAACGTCATC
1981   ATGTCTCACATTGTTGTAAATTCATTGTAGAGTCTTATATATAAATTTTTCATAAAAAAAAAAAAAAAAAAAAAAAAAAAAAA

```

**Figure S2.** Nucleotide and deduced AA sequences of *PpHSP60* from *P. pseudoannulata*s. A putative polyadenylation signal is marked in blue. Characteristic sequences of the HSP60 family are marked in yellow. Promoters and terminators are marked in green.

1 GCATGTGCTATTTTCGTGACACCTTTTACCTTCAGCAATAGTGCTTTGCTCCTTGTCGGTTAAAAGCCGAGTTAAATCGCTTTTCTCGTGT  
 91 AATTCCTATTTTGTATAGTTCAAGAAATTTTTATATAAACAATAATGCTTAAAAATTTAAGAAATACGAATTCAAATTTGCTTAGATCATC  
 1 M L K I L R N T N S N C L R S S  
 181 CGTTTTAGGCAGTTTCTATGGTTCAAGATTCTCTCACATCAAGCACATAATAAGGCACTGCTTATGTTGCCAACAAAAATGGACTTCA  
 17 V L G S F Y G S R F L S H Q A H N K A L L Y V A N K N G L Q  
 271 AATGCGATATAAGTCTGATGCTGTTAAAGGAAGTGTCAATTGGCATTGATTGGGAACAACGAATCATGTGTGCTGTTATGGATGGCAA  
 47 M R Y K S D A V K G S V I G I D L G T T N S C V A V M D G K  
 361 AACTCCAAAAGTAATAGAAAATCTGAAGGTTCAAGGACTACACCTTCTGTTGTTGCAATCAGAAAAGATGGTGAAGATTAGTTGGAAT  
 77 T P K V I E N S E G S R T T P S V V A I T K D G E R L V G M  
 451 GCCAGCTAAAAGACAAGCTATTACCAATGCAGCTAACACACTTTCTGCCACAAAGCGTTTGATCGGTCTAGGTTTGAGGATCCTGAGGT  
 107 P A K R Q A I T N A A N T L S A T K R L I G R R F E D P E V  
 541 GCAAAAAGACCAGAAAACAGCCTCATTCAAAATAGTTAAAGCATCAATGGTGATGCTTGGGTTGAAGCTCAAGGGAAAAATGATTCTCC  
 147 Q K D Q K T A S F K I V K A S N G D A W V E A Q G K M Y S P  
 631 AAGCCAAATTTGGTCTTTTATTTTAAATGAAAATGAAAGAGACAGAGAGTTGTTTGGGACAACTGTTAAAAATGCTGTCACTACTGT  
 177 S Q I G A F I L M K M K E T A E S C L G Q T V K N A V I T V  
 721 TCCTGCATATTTCAATGATTCTCAACGACAGGCAACCAAGATGCAGGCCAGATTGCAGGACTTAATGTACTTCGTGTAATTAATGAACC  
 207 P A Y F N D S Q R Q A T K D A G Q I A G L N V L R V I N E P  
 811 TACTGCTGCAGCCTTAGCTTATGGTATTGATAAAACAGATAAAAATAATTGCTGTTTATGATTGGGTTGGGGTACATTTGATATATCAGT  
 247 T A A A L A Y G I D K T D K I I A V Y D L G G G T F D I S V  
 901 TCTGAAAATTCAGAAAGGTGTTTTGAAGTAAATCTACTAATGGAGATACTTCTTGGGTGGTGAAGATTTTGACAATCTCTTGTAA  
 277 E I Q K G V F E V K S T N G D T F L G G E D F D N T L V N  
 991 TTATTTGGCAAAGGAGTTTAAAAAAGAACAAGGAGTTGATTATCAAAAGACACTATGGCAATGCAAAGATTAAGAAGCAAGCAGTGAAAA  
 307 Y L A K E F K K E Q G V D L S K D T M A M Q R L K E A A E K  
 1081 AGCTAAAATAGAGTTATCTTCATCTGTGCAACAGATATTAACITGCCATATCTGACTGTTGATGCAAGTGGACCAAGCATTGGAATAT  
 337 A K I E L S S S V Q T D I N L P Y L T V D A S G P K H L N I  
 1171 AAAATTATCTAGAGCTAAGCTTGAGAGTTTGGTGGCTGACCTAATCAAAAGGACAATTGAACCTTGCAAAAAGGCTATATCTGATGCTGA  
 367 K L S R A K L E S L V A D L I K R T I E P C K K A I S D A D  
 1261 TGTGAAAAAAGTATATCAAGAAGTAATTTTGTGTTGGAATGACTAGAATGCCAAAGGTACAAGAAGTTGTACAAGAAATTTTGG  
 397 V K K T D I Q E V I L V G G M T R M P K V Q E V V V Q E I F G  
 1351 AAGAGTCCCTAGTAAATCTGTGAATCCTGATGAAGCTGTGCTGTTGGAGCTGCAATTCAGGGTGGTGTCTTGTGCTGATGTCACAGA  
 427 R V P S K S V N P D E A V A V G A A I Q G G V L A G D V T D  
 1441 TGTTTTACTTTTAGATGTTACTCCTTTGTCATTGGGTATTGAACTCTTGGTGGCGTTTTCACAAAACCTATTACAAAAATACAACCAT  
 457 V L L L D V T P L S L G I E T L G G V F T K L I T K N T T I  
 1531 TCCAACCAAAAGAGTCAGATATTTTCTACTGCAGCAGATGGGAGACACAAGTAGAAATTAAGTATTCCAAGGAGAAAGAGAAATGGC  
 487 P T K K S Q I F S T A A D G Q T Q V E I K V F Q G E R E M A  
 1621 TGCAGATAACAACTTTTAGGACAGTTTTCATTGGTTGGCATTCCACTGCACCCAGGGGTGTTCTCAAAATGAGGTTATTTGATAT  
 517 A D N K L L G Q F S L V G I P P A P R G V P Q I E V T F D I  
 1711 TGATGCTAATGGAATGTCATGCTCTGCCGAGACGAGCTAGTGGCAAAGAACAAAACATTGTCATTTCAGTCTGTTGTTTAAAG  
 547 D A N G I V H V S A R D R A T G K E Q N I V I Q S S G G L S  
 1801 TAAAGATGAAATGAAAATATGATTAAGAATGCTGAGAAATATGCTGAACAAGATAAAATTAAGGAAACAGTTGAAGTTGTCAACCA  
 577 K D E I E N M I K N A E K Y A E Q D K I K K E T V E V V N Q  
 1891 AGCAGAAGGTATAATTATGATACGGAATCTAAGATGGAAGAGTTTAAAGCCAGTTACCTGAAGAAAGAGGTTACAAACATCAAAAACAA  
 607 A E G I I H D T E S K M E E F K S Q L P E E E V T N I K N K  
 1981 AATTAATGAAGTTAGGCAATTAATTACAAACAAAGATCAAGAGTCACCAAGAACATTGCGTAAAGCAACAAAGAACTACAGCAAGCATC  
 637 I N E V R Q L I T N K D Q E S P E T L R K A T Q E L Q Q A S  
 2071 TCTGAAGTTGTTTGAAGCTGTTACAAAAAGATGGCTAATGAAAGGCAAGGTGGTTCAACAGAAAGCAGTAGCAGTGAAGGTTCAAGTAC  
 667 L K L F E A A Y K K M A N E R Q G G S T E S S S S E S S S T  
 2161 TGAAGAAGCCGAAAAAGAAAGAAAAAATTAATAAGAAATCATGAAATTTTATGTGTGGGACTGATTCCAATAGCTGGCTATATATA  
 697 E E A E K K E E K N \*  
 2251 TATTGCCATTTTGCCTGTGCTGTCATTAAGAAACGTCATTGTAATATTTAAGTAATCAAAAGATGTTGATTACTGCAGAACCACTTGCA  
 2341 TTGTATTATAGCTCATCATTAACTCTGTAGATAAAAGATGTCTAAAAAATAATAATCTTTTATTTCATATGAAAAAAAAAAAAAAAAA  
 2431 AAAAAAAA

**Figure S3.** Nucleotide and deduced AA sequences of *PpHSC70* from *P. pseudoannulata*s. A putative polyadenylation signal is marked in blue. Characteristic sequences of the HSP70 family are marked in yellow, violet, and red. Promoters and terminators are marked in green.



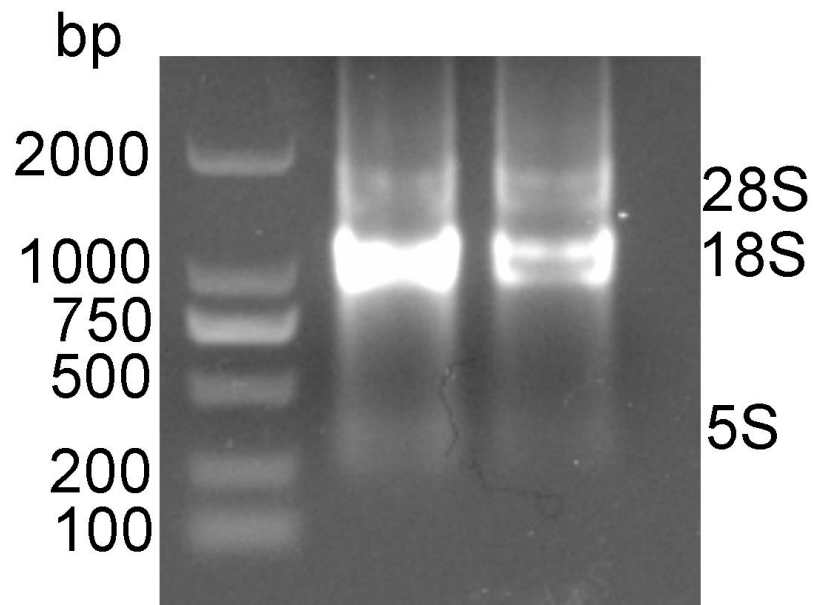

**Figure S4.** Agarose gel electropherogram of *P. pseudoannulata* RNA.

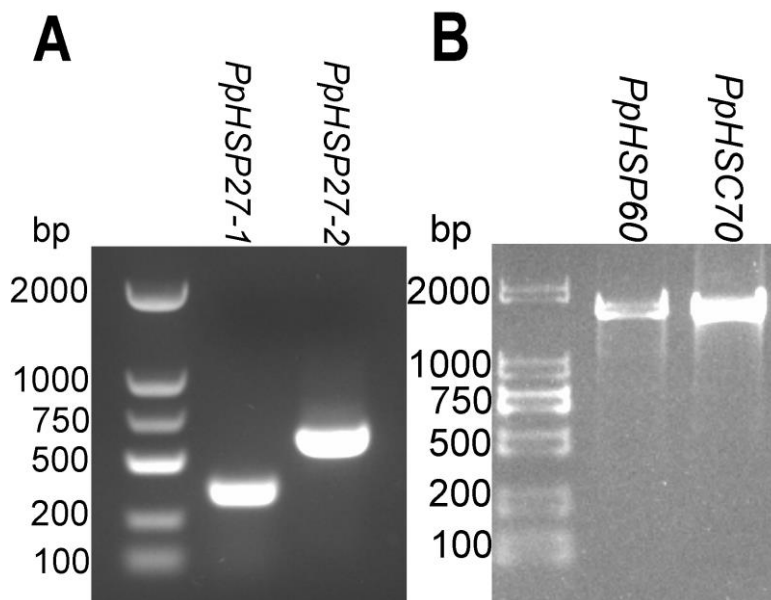

**Figure S5.** Agarose gel electropherogram of *PpHSP27*, *PpHSP60*, and *PpHSC70* intermediate fragments polymerase chain reaction (PCR) products. (A) *PpHSP27*, (B) *PpHSP60*, and *PpHSC70*.

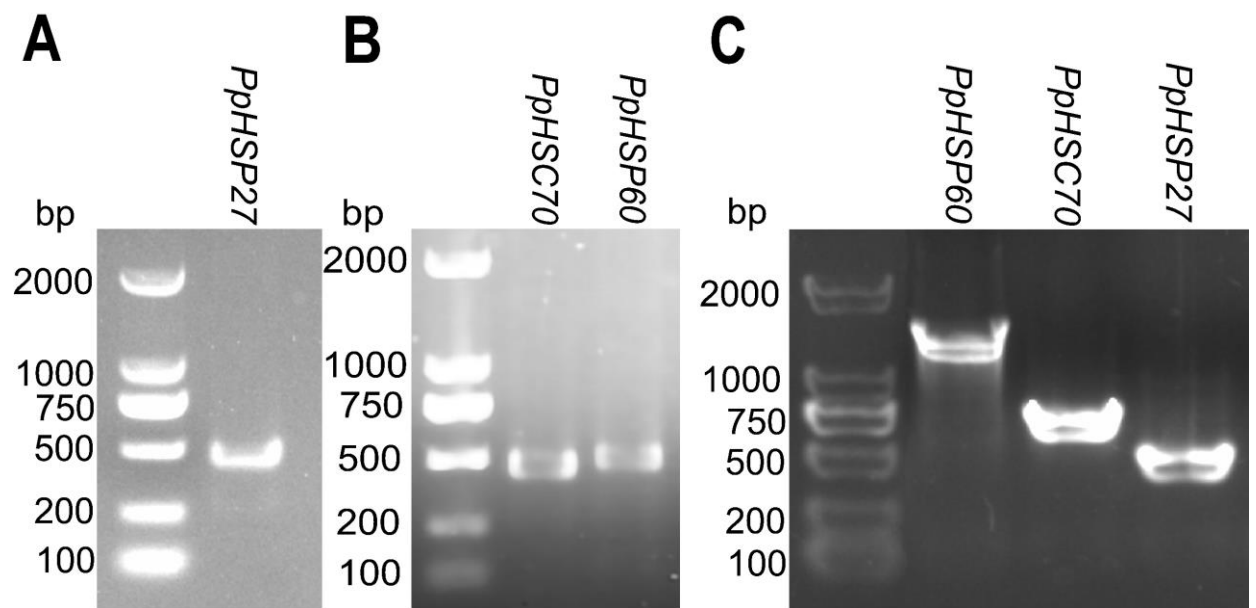

**Figure S6.** Agarose gel electropherogram of *PpHSP27*, *PpHSP60*, and *PpHSC70* untranslated region (UTR) PCR products. (A) *PpHSP27* 3'(UTR), (B) *PpHSP60*, and *PpHSC70* 3' UTR. (C) *PpHSP27*, *PpHSP60*, and *PpHSC70* 5' UTR.

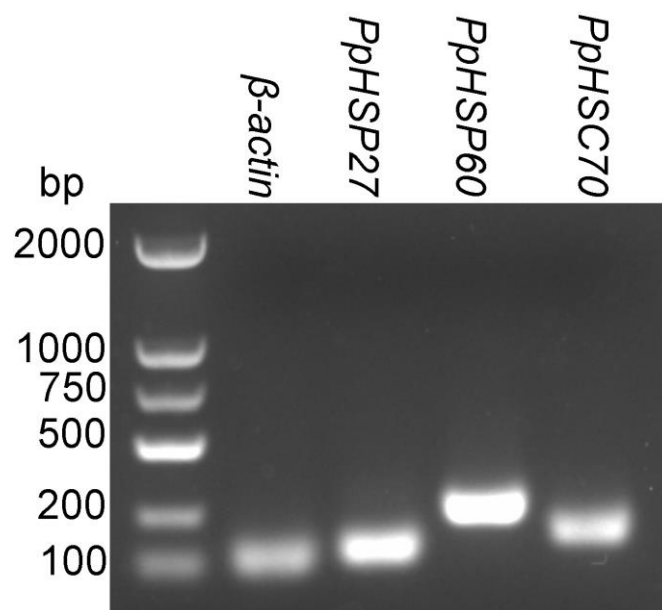

**Figure S7.** Agarose gel electropherogram of PCR products of qPCR primers.

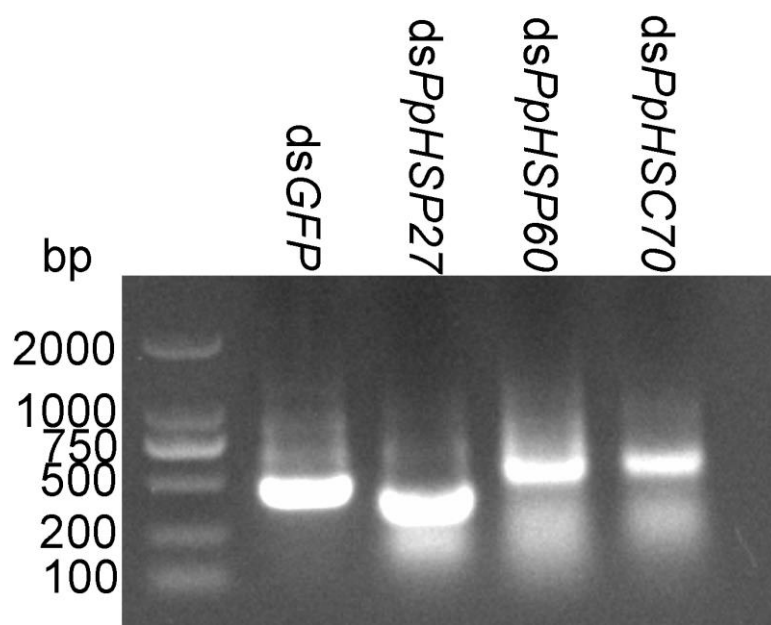

**Figure S8.** Agarose gel electropherogram of dsRNA.
